# Supplementary material
Source: HighWire-hosted journal article supplement (https://www.ajnr.org/highwire/filestream/99923/field_highwire_adjunct_files/0/0394.pdf)
Supplement: 0394.pdf [file 0394.pdf]

| <b>Characteristic</b> | <b>Overall</b> | <b>saccular</b> | <b>fusiform</b> | <b>partially thrombosed</b> | <b>saccular, no thrombosis</b> | <b>≥ 5mm, saccular, no thrombosis</b> |
|-----------------------|----------------|-----------------|-----------------|-----------------------------|--------------------------------|---------------------------------------|
| <b>n</b>              | 54             | 51              | 3               | 6                           | 47                             | 14                                    |
| <b>TP</b>             | 38             | 37              | 1               | 1                           | 36                             | 14                                    |
| <b>TN</b>             | 123            | 123             | 123             | 123                         | 123                            | 123                                   |
| <b>FP</b>             | 18             | 18              | 18              | 18                          | 18                             | 18                                    |
| <b>FN</b>             | 16             | 14              | 2               | 5                           | 11                             | 0                                     |
| <b>Sensitivity</b>    | 70.4%          | 72.6%           | 33.3%           | 16.7%                       | 76.6%                          | 100.0%                                |
| <b>Specificity</b>    | 87.2%          | 87.2%           | 87.2%           | 87.2%                       | 87.2%                          | 87.2%                                 |
| <b>Accuracy</b>       | 82.6%          | 83.3%           | 86.1%           | 84.4%                       | 84.6%                          | 88.4%                                 |
| <b>PPV</b>            | 67.9%          | 67.3%           | 5.3%            | 5.3%                        | 66.7%                          | 43.8%                                 |
| <b>NPV</b>            | 88.5%          | 89.8%           | 98.4%           | 96.1%                       | 91.8%                          | 100.0%                                |
